# Supplementary material for: Asymmetry of the Budding Yeast Tem1 GTPase at Spindle Poles Is Required for Spindle Positioning But Not for Mitotic Exit
Source: PubMed Central journal article supplement (PMC4450052; doi:10.1371/journal.pgen.1004938), 2015-02-06
Supplement: pgen.1004938.s001.pdf [file pgen.1004938.s001.pdf]

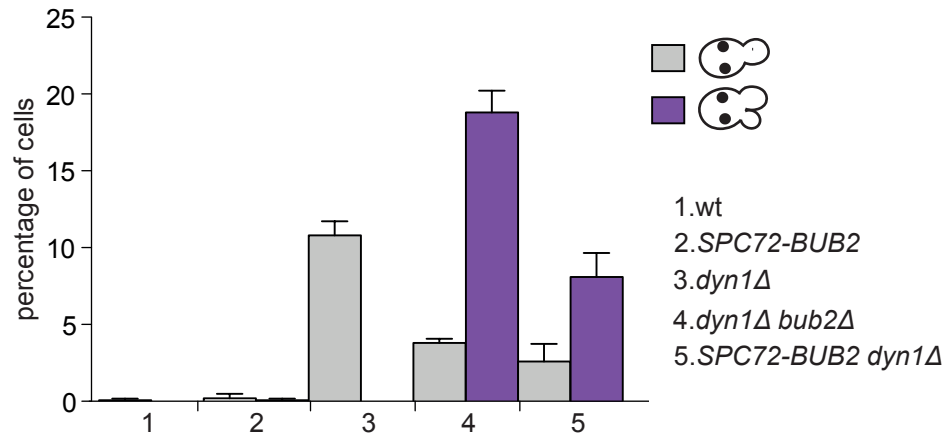

wt  
 dyn1 Δ  
 SPC72-BFA1  
 dyn1Δbub2Δ  
 dyn1Δ SPC72-BFA1  
 dyn1Δbub2Δ SPC72-BFA1  
 dyn1Δkin4Δ  
 dyn1Δkin4Δ SPC72-BFA1  
 dyn1Δbub2Δkin4Δ SPC72-BFA1
