# Supplementary material for: Asymmetry of the Budding Yeast Tem1 GTPase at Spindle Poles Is Required for Spindle Positioning But Not for Mitotic Exit
Source: PubMed Central journal article supplement (PMC4450052; doi:10.1371/journal.pgen.1004938), 2015-02-06

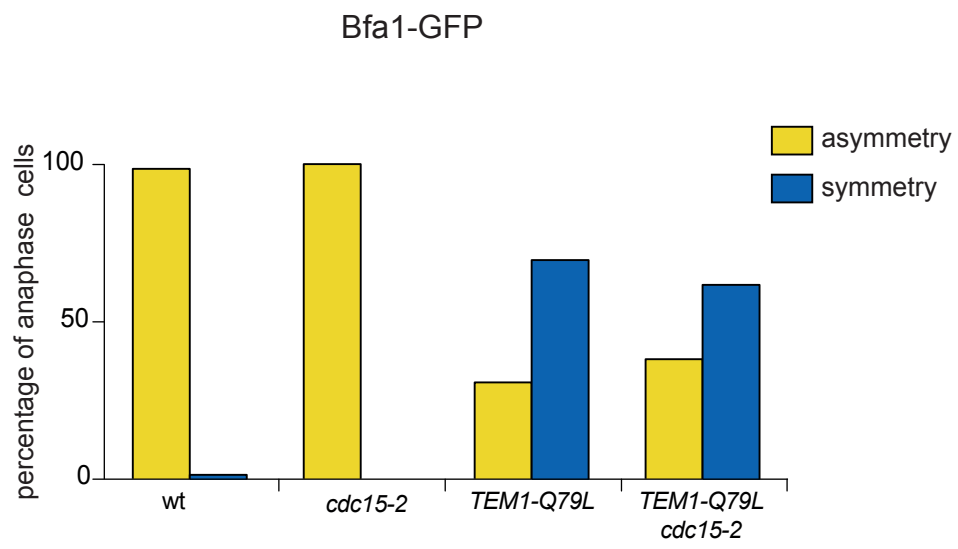

Supplement: pgen.1004938.s003.pdf [file pgen.1004938.s003.pdf]
