# Supplementary material for: Asymmetry of the Budding Yeast Tem1 GTPase at Spindle Poles Is Required for Spindle Positioning But Not for Mitotic Exit
Source: PubMed Central journal article supplement (PMC4450052; doi:10.1371/journal.pgen.1004938), 2015-02-06
Supplement: pgen.1004938.s004.pdf [file pgen.1004938.s004.pdf]

TABLE S1: TETRAD ANALYSIS AFTER CROSSING SEVERAL *BUB2* ALLELES WITH *tem1-3* OR *cdc5-2*

| <b>wt x <i>tem1-3</i> (26 tetrads)</b>                     |    |               |                        |                               |
|------------------------------------------------------------|----|---------------|------------------------|-------------------------------|
|                                                            | wt | <i>tem1-3</i> |                        |                               |
| viable                                                     | 49 | 47            |                        |                               |
| inviable                                                   | 3  | 5             |                        |                               |
| expected                                                   | 52 | 52            |                        |                               |
| <b><i>BUB2-myc9</i> x <i>tem1-3</i> (28 tetrads)</b>       |    |               |                        |                               |
|                                                            | wt | <i>tem1-3</i> | <i>BUB2-myc9</i>       | <i>tem1-3 BUB2-myc9</i>       |
| viable                                                     | 21 | 31            | 31                     | 2                             |
| inviable                                                   | 0  | 2             | 2                      | 19                            |
| expected                                                   | 28 | 28            | 28                     | 28                            |
| <b><i>BUB2-HA3</i> x <i>tem1-3</i> (26 tetrads)</b>        |    |               |                        |                               |
|                                                            | wt | <i>tem1-3</i> | <i>BUB2-HA3</i>        | <i>tem1-3 BUB2-HA3</i>        |
| viable                                                     | 28 | 23            | 24                     | 28                            |
| dead                                                       | 0  | 1             | 0                      | 0                             |
| expected                                                   | 26 | 26            | 26                     | 26                            |
| <b><i>SPC72-BUB2</i> x <i>tem1-3</i> (24 tetrads)</b>      |    |               |                        |                               |
|                                                            | wt | <i>tem1-3</i> | <i>SPC72-BUB2</i>      | <i>SPC72-BUB2 tem1-3</i>      |
| viable                                                     | 22 | 24            | 26                     | 21                            |
| inviable                                                   | 0  | 2             | 0                      | 1                             |
| expected                                                   | 24 | 24            | 24                     | 24                            |
| <b><i>SPC72-BUB2-myc9</i> x <i>tem1-3</i> (27 tetrads)</b> |    |               |                        |                               |
|                                                            | wt | <i>tem1-3</i> | <i>SPC72-BUB2-myc9</i> | <i>tem1-3 SPC72-BUB2-myc9</i> |
| viable                                                     | 24 | 29            | 29                     | 24*                           |
| inviable                                                   | 0  | 1             | 1                      | 0                             |
| expected                                                   | 27 | 27            | 27                     | 27                            |
| <b><i>SPC72-BUB2-HA3</i> x <i>tem1-3</i> (22 tetrads)</b>  |    |               |                        |                               |
|                                                            | wt | <i>tem1-3</i> | <i>SPC72-BUB2-HA3</i>  | <i>tem1-3 SPC72-BUB2-HA3</i>  |
| viable                                                     | 24 | 20            | 19                     | 22                            |
| inviable                                                   | 0  | 0             | 1                      | 2                             |
| expected                                                   | 22 | 22            | 22                     | 22                            |

\* synthetic sickness

| <b>wt x <i>cdc5-2</i> (27 tetrads)</b>                     |    |               |                        |                               |
|------------------------------------------------------------|----|---------------|------------------------|-------------------------------|
|                                                            | wt | <i>cdc5-2</i> |                        |                               |
| viable                                                     | 52 | 51            |                        |                               |
| inviable                                                   | 2  | 3             |                        |                               |
| expected                                                   | 54 | 54            |                        |                               |
| <b><i>BUB2-myc9</i> x <i>cdc5-2</i> (27 tetrads)</b>       |    |               |                        |                               |
|                                                            | wt | <i>cdc5-2</i> | <i>BUB2-myc9</i>       | <i>cdc5-2 BUB2-myc9</i>       |
| viable                                                     | 18 | 34            | 36                     | 0                             |
| inviable                                                   | 0  | 2             | 0                      | 18                            |
| expected                                                   | 27 | 27            | 27                     | 27                            |
| <b><i>BUB2-HA3</i> x <i>cdc5-2</i> (14 tetrads)</b>        |    |               |                        |                               |
|                                                            | wt | <i>cdc5-2</i> | <i>BUB2-HA3</i>        | <i>cdc5-2 BUB2-HA3</i>        |
| viable                                                     | 11 | 16            | 14                     | 11                            |
| inviable                                                   | 0  | 1             | 3                      | 0                             |
| expected                                                   | 14 | 14            | 14                     | 14                            |
| <b><i>SPC72-BUB2</i> x <i>cdc5-2</i> (19 tetrads)</b>      |    |               |                        |                               |
|                                                            | wt | <i>cdc5-2</i> | <i>SPC72-BUB2</i>      | <i>cdc5-2 SPC72-BUB2</i>      |
| viable                                                     | 13 | 24            | 25                     | 13                            |
| inviable                                                   | 0  | 1             | 0                      | 0                             |
| expected                                                   | 19 | 19            | 19                     | 19                            |
| <b><i>SPC72-BUB2-myc9</i> x <i>cdc5-2</i> (28 tetrads)</b> |    |               |                        |                               |
|                                                            | wt | <i>cdc5-2</i> | <i>SPC72-BUB2-myc9</i> | <i>cdc5-2 SPC72-BUB2-myc9</i> |
| viable                                                     | 24 | 31            | 32                     | 20*                           |
| inviable                                                   | 0  | 1             | 0                      | 4                             |
| expected                                                   | 28 | 28            | 28                     | 28                            |
| <b><i>SPC72-BUB2-HA3</i> x <i>cdc5-2</i> (21 tetrads)</b>  |    |               |                        |                               |
|                                                            | wt | <i>cdc5-2</i> | <i>SPC72-BUB2-HA</i>   | <i>cdc5-2 SPC72-BUB2-HA</i>   |
| viable                                                     | 16 | 23            | 24                     | 17                            |
| inviable                                                   | 1  | 2             | 1                      | 0                             |
| expected                                                   | 21 | 21            | 21                     | 21                            |

\* synthetic sickness
